# Supplementary material for: Relationship Between Retinal Perfusion and Retinal Thickness in Healthy Subjects: An Optical Coherence Tomography Angiography Study
Source: PubMed Central journal article supplement — Invest Ophthalmol Vis Sci. 2016 Jul 13;57(9):OCT204–10. doi: 10.1167/iovs.15-18630 (PMC4968770; doi:10.1167/iovs.15-18630), 2016-07-13

## Supplementary Figure

Figure S1. Definitions of the full retinal thickness (A) and the inner retinal thickness (B). The full retinal thickness was measured from the internal limiting membrane to the outer boundary of the retinal pigment epithelium. The inner retinal thickness was measured from the internal limiting membrane to the outer boundary of the inner nuclear layer.

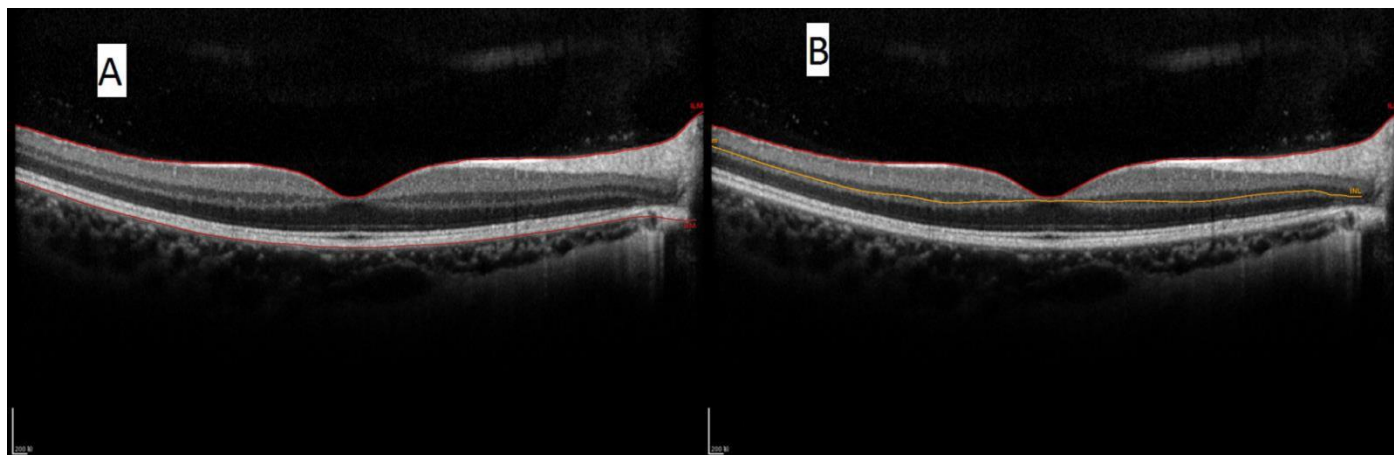

Supplement: i1552-5783-57-9-OCT204-s01.pdf [file i1552-5783-57-9-OCT204-s01.pdf]
