# Supplementary material for: Relationship Between Retinal Perfusion and Retinal Thickness in Healthy Subjects: An Optical Coherence Tomography Angiography Study
Source: PubMed Central journal article supplement — Invest Ophthalmol Vis Sci. 2016 Jul 13;57(9):OCT204–10. doi: 10.1167/iovs.15-18630 (PMC4968770; doi:10.1167/iovs.15-18630), 2016-07-13
Supplement: i1552-5783-57-9-OCT204-s02.pdf [file i1552-5783-57-9-OCT204-s02.pdf]

## Supplementary Tables

Table S1. Relationships between Retinal Perfusion and Full Retinal Thickness in the Parafoveal Region

| Variables included in the model          | Vessel area density |          |
|------------------------------------------|---------------------|----------|
|                                          | $\beta$             | <i>P</i> |
| Age (years)                              | -0.000684           | 0.063    |
| HR (beats/min)                           | 0.000353            | 0.441    |
| OPP (mmHg)                               | 0.000612            | 0.411    |
| SE (D)                                   | 0.008488            | 0.038*   |
| IOP (mmHg)                               | 0.000938            | 0.613    |
| Full retinal thickness ( $\mu\text{m}$ ) | 0.000530            | 0.121    |

The relationships were determined using the linear mixed model with adjustment for the indicated independent variables.

HR: heart rate; OPP: ocular perfusion pressure; SE: spherical equivalent; D: diopters; IOP: intraocular pressure.

\* $P < 0.05$ .

Table S2. Variabilities in Retinal Thickness and Perfusion in the Peripapillary and Macular Regions

| Variables                                 | Variation |
|-------------------------------------------|-----------|
| Peripapillary region                      |           |
| RNFL ( $\mu\text{m}$ )                    | 1.5       |
| Vessel area density                       | 1.2       |
| Parafoveal region                         |           |
| Inner retinal thickness ( $\mu\text{m}$ ) | 1.3       |
| Full retinal thickness ( $\mu\text{m}$ )  | 1.2       |
| Vessel area density                       | 1.5       |
| Fovea                                     |           |
| Inner retinal thickness ( $\mu\text{m}$ ) | 2.3       |
| Full retinal thickness ( $\mu\text{m}$ )  | 1.4       |
| Capillary-free zone ( $\text{mm}^2$ )     | 10.3      |

Variation = largest/smallest.

RNFL: retinal nerve fiber layer.

Table S3. Relationships Between Retinal Perfusion and Age and Inner retinal thickness in Subjects Aged > 35 Years in the Parafoveal and Perifoveal Regions

| Variables included in the model           | Vessel area density |          |
|-------------------------------------------|---------------------|----------|
|                                           | $\beta$             | <i>P</i> |
| Age (years)                               | -0.001679           | 0.019*   |
| HR (beats/min)                            | 0.000685            | 0.149    |
| OPP (mmHg)                                | 0.001013            | 0.164    |
| SE(D)                                     | 0.0012015           | 0.054    |
| IOP (mmHg)                                | 0.001355            | 0.496    |
| Inner retinal thickness ( $\mu\text{m}$ ) | 0.001373            | 0.021*   |

The relationships were determined using the linear mixed model with adjustment for the indicated independent variables.

HR: heart rate; OPP: ocular perfusion pressure; SE: spherical equivalent; IOP: intraocular pressure.

\**P* < 0.05.
